# Supplementary material for: Besides Pathology: Long Non-Coding RNA in Cell and Tissue Homeostasis
Source: Noncoding RNA. 2018 Jan 30;4(1):3. doi: 10.3390/ncrna4010003 (PMC5890390; doi:10.3390/ncrna4010003)
Supplement: Supplementary file 1 [file ncrna-04-00003-s001.xlsx]

## Sheet: Plan1
Table S1. LncRNAs described in homeostasis of different cells and tissues.
Tissue/Cell type	LncRNA(s)	Role/Effect/Expression	Methodology	Reference
Erythrocytes	Fas-AS1	Up-regulated in erythroid differentiation; protect erythroblasts from Fas death signals.	RT-PCR array; ChIP-analysis; flow cytometry; functional assays	[24]
	Unknown lncRNA	Overlapped and co-expressed with miR-4732, proximal to miR-144/451 cluster, implicated in erythropoiesis	RNA-seq; RT-qPCR; western blot; functional analysis	[29]
	elncRNA-EC3	Positively correlated with KIF2A expression in erythroblasts	RNA-seq; FISH; retroviral transduction; flow cytometry	[26]
	alncRNA EC-7	Required for activation of BAND 3 protein
	DLEU2	Possibly important in erythropoiesis
	LincRNA-EC-2, -EC-4 and -EC-9	Required for erythrocyte maturation in the fetal liver
	lincRNAs-EPS	Involved in erythroid maturation
		Erythroid differentiation by preventing apoptosis	RACE; microarray; RT-qPCR; functional assays	[27]
Other myeloid lineage cells	HOTAIRM1	Monocyte differentiation to dendritic cells through binding with miR-3960	ChIP-chip analysis	[32]
	Morrbid	Specifically expressed in mature short-lived myeloid cells, increasing their lifespan in response to pro-survival cytokines	CRISPR/Cas9; Flow cytometry; ChIP-qPCR; ChIP-seq; functional studies; others	[30]
	LincRNA-Cox2	Induces Ccl5 expression in LPS-stimulated immortalized macrophage cell lines	Microarray; luciferase; RIP; ChIP; ChIRP; in situ hibridization; functional assays	[27]
		Most induced lncRNA in macrophages stimulated with Pam3CSK4	RNA-seq; PCR; RT-qPCR; funtional assays	[33]
		Induced in DCs after TLR4 stimulation with LPS	Microarray; in silico analysis	[18]
	GAS5, CEBPB-AS1, LINCPINT, ITGB2-AS1, FGD5-AS1, LINC00678, LINC00657, LINC00989 and LINC01420	Overexpressed in monocytes	RNA-seq; RT-qPCR; in silico analysis	[31]
	lnc-DC	Specific to dendritic cells; regulates DC differentiation by interaction with STAT3	Microarray; RNA-seq; RT-qPCR; RNAi knockdown; immunoblot; FISH; pull-down assays	[35]
T lymphocytes	NRON	Affects NFAT defosforilation	RT-qPCR; western blot; siRNA knockdown	[40]
	Tmevpg1	Positively regulates Ifng gene expression. Preferentially expressed in Th1 cells	RT-qPCR; siRNA knockdown	[41,42]
	LincR-Ccr2-5′AS	Component of a regulatory circuit in gene expression specific to the Th2 subset of helper T cells	RNA-seq; siRNA knockdown; ChIP-seq	[42]
	GATA3-AS1	Specific expressed in primary Th2 cells	RNA-seq; RT-qPCR	[46]
	lincMAF-4	Th1 specific lincRNA, regulates MAF expression	RNA-seq; RIP; ChIP	[44]
	IFNG-AS1 and IFNG-R-49	Expressed in effector memory T cell, required for IFNG prompt expression.	siRNA knockdown; RT-qPCR	[49]
B lymphocytes	Xist	Lost co-localization with inactivated X chromosome in female pro-B cells and non-activated B cells, being restored during mature B cells activation	RNA and DNA FISH; immunofluorescence; RT-qPCR; RNA-seq; in vivo assays	[52]
	NONHSAT040475	High expression in B cells	Flow cytometry; RT-qPCR	[38]
	MYB-AS1, SMAD-AS1, LEF1-AS1 and CTC-436K13.6	Differentially expressed in early stage of B-cell development	Flow cytometry; exon arrays; weighted gene co-expression network analysis	[50]
NK cells	Rroid	Specific to NK cells and others innate lymphoid cells	Flow citometry; RNA fluorescence in situ hybridization; RNA-seq; RT-qPCR; CHIP qPCR; functional assays in vivo and in vitro	[55]
	lnc-CD56	Positively correlated with expression of CD56 marker in primary and some differentiated human NK cells	Microarray; RT-qPCR; flow cytometry; functional assays	[53]
	NONHSAT040475	Low expression in NK cells	Flow cytometry; RT-qPCR	[38]
	KIR antisense LncRNA	Silences KIR genes during NK cell development; has binding sites for MZF-1, and hematopietic and myeloid transcription factor	RACE; RT-qPCR; EMSA; functional assays	[54]
Epidermal tissue	ZEB2-AS1	Regulates E-cadherin expression by Zeb2 activation	RT-qPCR; luciferase report assay; western blot	[56]
	ncRNA-a1	Increases its expression after keratinocyte differentiation.	Custom made microarray	[59]
	ANCR	Undifferentiation of epidermis, regulates expression of MAF:MAFB transcription factors.	RT-qPCR; tiling array hibridization	[60,57]
	TINCR	Promote somatic tissue differentiation; interacts with STAU1, regulates expression of MAF:MAFB transcription factors.	RT-qPCR; RNA-FISH; northern blotting	[61,57]
	RP11-766N7.3; H19; HOTAIR	Regulates Wnt signaling , maintaining hair-induction activity.	Microarray; RT-qPCR	[63]
	Wincr1	Expressed in primary dermal fibroblast. Affects expression of many genes, as Col1a1 and Mmp10	RNA-seq; RT-qPCR, knockdown	[64]
	H19	Promotes keratinocyte differentiation by acting as competitive endogenous RNA for miR-130b-3p	Luciferase report assay; pull-down assay; shRNA knockdown	[62]
Nervous tissue	HAR1A	Expressed during cortical neuron development, possibly influences the establishment of regional forebrain organization	RT-qPCR; RNA-FISH	[66]
	DLX6-AS1	Affects ventral forebrain development	RT-qPCR; ChIP; immunohistochemistry; western blot	[67]
	MALAT-1	Regulates synaptogenesis	Northern blot; RNA-FISH, imunochemistry; RT-qPCR	[78]
	HOTAIRM1	Expressed early in neurogenesis. Important for HOXA genes regulation	RNA-seq, RT-qPCR	[70]
	Pnky	Regulates neural stem cells differentiation; interacts with splicing regulator PTBP1.	RNA-seq; RNA pull dow; mass spectrometry; FISH	[68]
	H19, Esco2, Pcdhb18 and RGD1560277	Downregulated after differentiation of bone marrow mesenchymal cells (BMSCs) into neural cells.	Microarray, RT-qPCR	[72]
	C6orf176 and MIAT	Upregulated in neural cell line after stimulation with brain-derived neurotrophic factor	Microarray, RT-qPCR	[72]
	LncND	Expressed in neural progenitor cells. Act as miRNA sponge for mir-143-3p	RT-qPCR, Knockdown, overexpression, RNA-seq	[69]
	Meg3	Modulates α-amino-3-hydroxy-5-methyl-4-isoxazolepropionic acid receptors (AMPARs) expression in prymary cortical neurons.	RT-qPCR, shRNA and ASO-mediated knockdown.	[79]
	lncOL1	Overexpression promotes olygodendrocyte differentiation.	RNA-seq, RT-qPCR, siRNA knockdown	[77]
Muscular tissue: cardiac, skeletal, smooth	lnc-mg	Up-regulated in skeletal muscle; induces cell differentiation and muscle hypertrophy; sponge of miR-125b, a negative regulator of IGF2	RT-PCR; Immunofluorescence; luciferase; microarray, immunoprecipitation; functional studies in vitro and in vivo	[90]
	Upperhand	Maintain epigenetic mechanisms required for expression of the cardiac transcription factor Hand2	In situ hybridization; TALEN-mediated homologous recombination; ChIP; RACE PCR; RNA immunoprecipitation	[84]
	Ppp1r1b; others lncRNAs	Postnatal cardiac development; regulates Tcap expression	RNA-seq; gPCR; RT-qPCR; functional assays	[88]
	DWORF	Enhances activity of SERCA calcium pump	CRISPR/Cas9 and various functional assays	[14]
	Myoregulin	Reduces activity of SERCA calcium pump	RT-qPCR; in situ hibridization; CRISPR/Cas9 and various functional assays	[15]
	ALIEN	Impairs cardiovascular development	RNA-seq; functional assays	[86]
	TERMINATOR	Controls pluripotent stem cell identity; associated with regulators of pluripotency
	PUNISHER	Compromises endothelial cell function
	CARMEN	Cardic cell differentiation	ChIP-seq; RT-qPCR; immunohistochemistry; functional assays	[85]
	MUNC	Induces the myoblast differentiation	ChIP-seq; microarray; RT-qPCR; immunifluorescence; western blot; poyribosome fractionation; funtional assays	[93]
	LncMyoD	Activated by MyoD during myogenesis and myoblast differentiation	RNA-seq; immunoblotting; RT-qPCR; immunofluorescence; luciferase; RACE; RIP; ChIP; microarray; functional assays	[94]
	SMAD7-lncRNA	Embrionic stem cells differentiation to cardiomyocytes	ChIP-seq; RT-qPCR; flow cytometry; functional assays	[87]
	CARL	Supresses mitochondrial fission and cardiomyocyte apoptosis	Immunoblot and immunofluorescence; northern blot; RT-qPCR; functonal assays	[89]
	SENCR	Repressor of the smooth muscle cell migration	RNA-seq; strand-specific primers RT-PCR; qPCR; FISH; western blot; functional assays	[97]
	H19	Highly expressed in skeletal muscles, induced by MyoD; precursor of miR-675-3p and miR-675-5p, involved in skeletal muscle differentiation and regeneration	Microarray; RT-qPCR; luciferase; western blot; immunochemistry and immunohistochemistry; functional assays	[92]
		Acts as sponge to miRNAs of let-7 family, involved in muscle differentiation anticipation and in glucose metabolism	Microarrays; Luciferase; immunoprecipitation; western blot; RT-qPCR	[91]
	Braveheart	Cardiovascular development	RACE; RNA-seq; ChIP-analysis; RT-qPCR; flow cytometry	[82]
	Fendrr	Cardiac and mesodermal development (in mice); interacts with PRC2 and TrxG/MLL complexes	In situ hibridization; RT-qPCR; flow cytometry; ChIP analysis; functional assays	[83]
	Ang362	Proliferation of vascular smooth muscle cells; regulated by angiotensin II	RNA-seq; ChIP-seq; RT-qPCR; functional assays	[96]
	Linc-MD1	Regulates muscle differentiation	ChIP analysis; RT-qPCR	[95]
Adipose and bone tissues	H19	Promotes osteoblast differentiation. Possibly function as a key mediator of BMP9 signalling	RT-qPCR, dual luciferase reporter assay, western blot, immunofluorescence staining	[114,115]
	lncRNA ENST00000502125.2	Negative regulator of osteogenic differentiation	RT-qPCR, microarray, ALP staining	[116]
	lncRNA XR_111050	Enhances the osteogenic differentiation potential of MSCs	Microaaray, RT-qPCR, alizarin red detection	[117]
	UCA1	Induces chondrocytic differentiation	RT-qPCR, siRNA silencing, western blot	[118]
	DANCR	negativaly controls osteogenic differentiation	RT-qPCR, overexpression, western blot,	[119]
	Meg3	Down-regulated in adipogenesis and up-regulated in osteogenesis, during differentiation of human adipose stem cells	RT-qPCR; western blot; functional assays in vitro and in vivo	[111]
	GM13133	Enriched in brown adipocytes; inhibits white adipocytes differentiation	RNA-seq; RT-qPCR; western blot; mitochondrial DNA quantification; functional assays in vivo	[109]
	Blnc1	Forms ribonucleoprotein complex with EBF2 to stimulate thermogenic adipocyte formation; promotes brown and beige adipocyte differentiation and function	Microarray; RT-qPCR; immunoblotting; ChIP analysis	[106,105]
	MIAT	Osteogenic differentiation in human-adipose derived stem cells	RT-qPCR; western blot; functional assays	[112]
	MIR31HG	Osteogenic differentiation in human-adipose derived stem cells	Functional assays	[113]
	NEAT1	Upregulated in adipocytes; enhanced by miR-140	Functional assays	[101]
	U90926	U90926 levels are negatively correlated with 3T3-L1 preadipocyte differentiation	RT-qPCR; FISH; functional assays	[102]
	lnc-BATE1	Required for development and maintenance of brown adipocytes	RNA-seq; RNA immunoprecipitation; RNA pull-down; functional assays	[107]
	lnc-BATE10	Necessary for brown adipocytes differentiation. Promotes Pgc1α expression.	RNA-seq, RT-qPCR, RIP, RNA pulldown, norhern blot, reporter assay	[108]
	HOTAIR	Adipocyte differentiation in gluteal adipose tissue	Microarrays; RT-qPCR	[104]
	PU.1 AS lncRNA	Promotes adipogenesis through preventing PU.1 mRNA translation, forming mRNA/AS lncRNA duplex in preadipocytes	RT-qPCR; functional assays	[103]
	SRA	Adipogenesis regulation and insulin sensivity	Microarray; functional assays	[99]
Hepatic tissue	MALAT1	Liver regeneration	ELISA; western blot; flow cytometry; Functional assays	[127]
	lnc-HC	Repress bile acid biosynthesis and cholesterol export, by interaction with hnRNPA2B1	RT-qPCR; functional assays	[124]
	LeXis	Affects expression of cholesterol biosynthetic genes and cholesterol levels in liver and plasma	RT-qPCR; RNA-seq; RNA fractionation; RACE; microarray; ChIP; ChIRP; functional assays	[122]
	H19	Liver development; inhibits proliferation of fetal liver cells and the Wnt signaling pathway	Cell culture and transfection	[120]
	Gm16551	Specifically expressed in liver	Microarray; in silico analysis; functional assays in vivo	[125]
	LncLSTR	Liver-specific LSTR leads to plasmatic clearence of triglycerides, by increasing ApoC2 expression in mice	Functional assays	[123]
	AT102202	Cholesterol metabolism	Microarray	[126]
	APOA1-AS	Negative regulator of APOA1	RACE; RT-qPCR; ChIP analysis; in vivo analysis	[121]
Pancreatic tissue	HI-lnc25	Positively correlated with mRNA GLIS3 (important for insulin biosynthesis	RT-qPCR, miR Based Knockdown assay, RNA-seq, ChIP-seq	[128]
	HI-lnc78, HI-lnc80	Regulated by glucose exposure
	Blinc1	Specific expressed in embryonic pancreas and adult islets (β cells	RNA in situ hibridization, Immunoflorescence, RNA-seq, RT-qPCR	[129]
	PLUTO	Regulates PDX1 expression in β cells	RNA-seq, ChIP-seq, RT-qPCR	[130]
	TUG1	Highly expressed in β cells. Important for insulin secretion	RT-qPCR, SiRNA knockdown, western-blot, flow cytometry	[133]
	MEG3	Highly expressed in pancreas. Downregulated in higher glucose concentrations.	RT-qPCR, siRNA knockdown, western-blot, flow cytometry, immunohistochemistry	[132]
	Gas5	Highly expressed in pancreatic islets. Its expression is regulated by glucose concentrations	RT-qPCR, SiRNA knockdown, western-blot, flow cytometry	[131]
Intestinal tissue	H19	Competes with miR-874, maintaing normal expression of AQP3	RT-qPCR; RIP; western blot; immunohistochemistry; functional assays	[137]
	SPRY4-IT1	Up-regulates the expression of tight junction proteins, protecting intestinal epithelial barrier	RT-qPCR; western blot; functional assays	[135]
	lincRNA-Cox2	Up-regulated in intestinal epithelial cells after TNFα stimulation; modulates Il12b transcription	RT-qPCR; microarray; western blot; functional assays	[138]
Lung tissue	NANCI	Regulates lungs development. Upregulated Nkx2.1	RNA-seq, shRNA knockdown, RT-qPCR, microarray, western blot, ChiP:PCR	[139, 140]
	RP11‐380D23.2	Drives distal-proximal lung morphogenesis. Regulates the protein coding gene PITX2.	RT-qPCR, siRNA knockdown, RNA-seq, microarray, ChIP, Immunofluorescence	[141]
Gametogenesis and germ cells	Mrhl	Negativaly regulates Wnt signaling pathway in mouse spertagonial cell. Also, it is downregulated upon Wnt signaling activation.	RT-qPCR;siRNA silencing, luciferase reporter assay, ChIP-PCR, EMSA, RNA-FISH	[145, 146]]
	AK124742	Highly expressed in human cumulus cells.	RT-qPCR	[142]
	AK015322	Promotes proliferation of mouse spermatogonial stem cell line C18-4 in vitro by serve as a decoy of microRNA-19b-3p.	RT-qPCR, RNA imunoprecipitation	[147]
	Tslrn1	Influences sperm count in mouse.	RNA-seq, RT-qPCR, CRISPR-Cas9 genome editing for knockout mouse	[149]
	lncRNA-A-30-P01019163	Regulate P2rx7 expression in the ovary. Affect ovarian cell cycle.	Microarray, RT-qPCR	[144]
Extracellular vesicles	RN7SL1, RPPH1, VTRNA2-1, RMRP, RNU11, MALAT1 and others lncRNAs	Transported in extracellular vesicles of healthy women	RNA-seq; RT-qPCR	[157]
	RMRP, Exo2, Exo4 and other exosomal lncRNAs	Might modulate protein functions and cell viability in recipient cells	RNA-seq; ChiP; immunoprecipitation and mass spectometry	[156]
	HOTAIR, lincRNA-p21, ncRNA-CCND1	Enriched in extracellular vesicles, in contrast to low levels in cells	RT-qPCR; ELISA	[154]
Legend: the large-scale studies without identification/focusing in specific lncRNAs, are not included in this table. The lncRNAs are cited according to their identifications used in the original articles. RT-qPCR: quantitative reverse transcription PCR. ChIP: chromatin immunoprecipitation. RNA-seq: RNA sequencing. FISH: fluorescent in situ hybridization. RACE: rapid amplification of cDNA ends. RI…
